# Supplementary material for: Layered double hydroxide nanoparticles promote self-renewal of mouse embryonic stem cells through the PI3K signaling pathway
Source: Royal Society of Chemistry journal article supplement (doi:10.1039/c5nr02339d), 2015-01-01
Supplement: c5nr02339d1.pdf [file c5nr02339d1.pdf]

## Supplementary Information

| Genes          | GenBank number | Primer sequence                                          | Annealing Temp |
|----------------|----------------|----------------------------------------------------------|----------------|
| $\beta$ -actin | NM_007393      | F:AAATCGTGCGTGACATCAAAGAGAA<br>R:ACCCAAGAAGGAAGGCTGGAAAA | 60°C           |
| Pdx1           | NM_00814       | F:AAAACCGTCGCATGAAGTGG<br>R:CCCGCTACTACGTTTCTTATCTTCC    | 60°C           |
| GATA4          | NM_008092      | F:CTGGCCTGTCATCTCACTACG<br>R:TGTCCTCTCGGCCCTGAAGC        | 60°C           |
| Runx1          | NM_001111022   | F:GGCACTCTGGTCACCGTCAT<br>R:CGTTGAATCTCGCTACCTGGTT       | 60°C           |
| $\alpha$ -SMA  | NM_007392.2    | F:CCCCTGAAGAGCATCCGACA<br>R:TCTCCAGAGTCCAGCACAAATAC      | 60°C           |
| Sox1           | NM_009233      | F: GAGATGATCAGCATGTACCTGCC<br>R: GTAGTGCTGTGGCAGCGAGT    | 60°C           |
| Nestin-FP      | NM_016701.3    | F:GAGTGGAAACTGAGGATAAGGC<br>R:TCCCGTCTGCTCTGGTTGT        | 60°C           |

**Supplementary Table 1.** Primer sequences for real-time PCR of target genes.

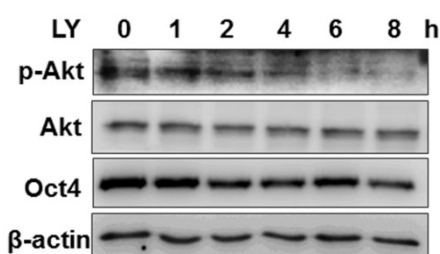

**Supplementary Figure 1.** Expression of phospho-Akt and Oct4 in mESCs after the treatment of PI3K inhibitor LY294002 within 8h. Total Akt and  $\beta$ -actin were used as loading control.

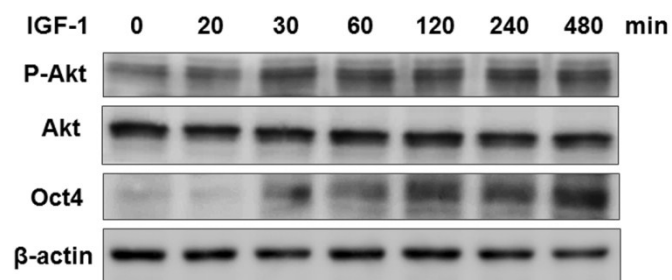

**Supplementary Figure 2.** Western blot analysis of the expression of phospho-Akt and Oct4 in mESCs at different time points after the addition of 50ng/ml IGF-1. Total Akt and  $\beta$ -actin were used as loading control.

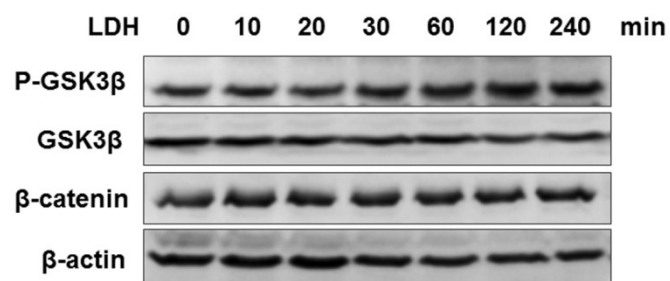

**Supplementary Figure 3.** Western analysis of the expression of phosphorylated GSK3 $\beta$  and  $\beta$ -catenin in the presence of LDH NPs within 240min. Total GSK3 $\beta$  and  $\beta$ -actin were used as loading control.

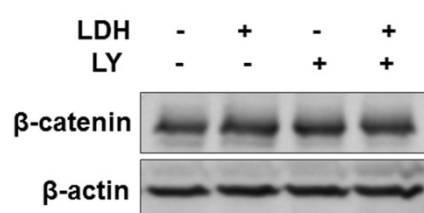

**Supplementary Figure 4.** Effect of PI3 kinase inhibitor LY294002 (LY) on  $\beta$ -catenin expression.  $\beta$ -actin was used as loading control.

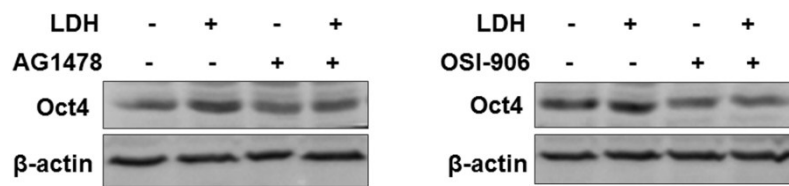

**Supplementary Figure 5.** Influence of membrane-receptor inhibitors on LDH-treated mESCs. Western blot investigated the effect of EGF receptor inhibitor AG1478 and IGF-1 receptor inhibitor OSI-906 on LDH-induced Oct4 in mESCs.  $\beta$ -actin was used as loading control.
